# Supplementary material
Source: Oxford University Press journal article supplement (doi:10.1093/g3journal_jkac120)
Supplement: jkac120_supplementary_data.pdf [file jkac120_supplementary_data.pdf]

| Strain/Plasmid                                     | Description                                                                                                                                                                                                                                             | Source                    |
|----------------------------------------------------|---------------------------------------------------------------------------------------------------------------------------------------------------------------------------------------------------------------------------------------------------------|---------------------------|
| Wildtype (yAAD1253)                                | <i>MAT<math>\alpha</math></i> , <i>ura3-52</i> , <i>leu2<math>\Delta</math>1</i> , <i>his3<math>\Delta</math>200</i> , <i>lys2-128<math>\delta</math></i>                                                                                               | (DUINA AND TURKAL 2017)   |
| <i>hht2<math>\Delta</math></i> (yAAD165)           | <i>MAT<math>\alpha</math></i> , <i>ura3-52</i> , <i>leu2<math>\Delta</math>1</i> , <i>his3<math>\Delta</math>200</i> , <i>trp1<math>\Delta</math>63</i> , <i>lys2-128<math>\delta</math></i> , <i>hht2<math>\Delta</math>::URA3:TRP1</i>                | (DUINA AND TURKAL 2017)   |
| <i>hht1<math>\Delta</math></i> (ACY2818)           | <i>MAT<math>\alpha</math></i> , <i>ura3-52</i> , <i>leu2<math>\Delta</math>1</i> , <i>his3<math>\Delta</math>200</i> , <i>lys2-128<math>\delta</math></i> , <i>hht1<math>\Delta</math>::kanMX</i>                                                       | This Study                |
| <i>hht2-K36R</i> (ACY2816)                         | <i>MAT<math>\alpha</math></i> , <i>ura3-52</i> , <i>leu2<math>\Delta</math>1</i> , <i>his3<math>\Delta</math>200</i> , <i>trp1<math>\Delta</math>63</i> , <i>lys2-128<math>\delta</math></i> , <i>hht2-K36R</i>                                         | This Study                |
| <i>hht2-K36R hht1<math>\Delta</math></i> (ACY2821) | <i>MAT<math>\alpha</math></i> , <i>ura3-52</i> , <i>leu2<math>\Delta</math>1</i> , <i>his3<math>\Delta</math>200</i> , <i>trp1<math>\Delta</math>63</i> , <i>lys2-128<math>\delta</math></i> , <i>hht2-K36R</i> , <i>hht1<math>\Delta</math>::kanMX</i> | This Study                |
| <i>hht2-K36M</i> (ACY2830)                         | <i>MAT<math>\alpha</math></i> , <i>ura3-52</i> , <i>leu2<math>\Delta</math>1</i> , <i>his3<math>\Delta</math>200</i> , <i>trp1<math>\Delta</math>63</i> , <i>lys2-128<math>\delta</math></i> , <i>hht2-K36M</i>                                         | This Study                |
| <i>hht2-K36M hht1<math>\Delta</math></i> (ACY2822) | <i>MAT<math>\alpha</math></i> , <i>ura3-52</i> , <i>leu2<math>\Delta</math>1</i> , <i>his3<math>\Delta</math>200</i> , <i>trp1<math>\Delta</math>63</i> , <i>lys2-128<math>\delta</math></i> , <i>hht2-K36M</i> , <i>hht1<math>\Delta</math>::kanMX</i> | This Study                |
| <i>hht2-G34W</i> (ACY2823)                         | <i>MAT<math>\alpha</math></i> , <i>ura3-52</i> , <i>leu2<math>\Delta</math>1</i> , <i>his3<math>\Delta</math>200</i> , <i>trp1<math>\Delta</math>63</i> , <i>lys2-128<math>\delta</math></i> , <i>hht2-G34W</i>                                         | This Study                |
| <i>hht2-G34W hht1<math>\Delta</math></i> (ACY2825) | <i>MAT<math>\alpha</math></i> , <i>ura3-52</i> , <i>leu2<math>\Delta</math>1</i> , <i>his3<math>\Delta</math>200</i> , <i>trp1<math>\Delta</math>63</i> , <i>lys2-128<math>\delta</math></i> , <i>hht2-G34W</i> , <i>hht1<math>\Delta</math>::kanMX</i> | This Study                |
| <i>hht2-G34L</i> (ACY2831)                         | <i>MAT<math>\alpha</math></i> , <i>ura3-52</i> , <i>leu2<math>\Delta</math>1</i> , <i>his3<math>\Delta</math>200</i> , <i>trp1<math>\Delta</math>63</i> , <i>lys2-128<math>\delta</math></i> , <i>hht2-G34L</i>                                         | This Study                |
| <i>hht2-G34L hht1<math>\Delta</math></i> (ACY2833) | <i>MAT<math>\alpha</math></i> , <i>ura3-52</i> , <i>leu2<math>\Delta</math>1</i> , <i>his3<math>\Delta</math>200</i> , <i>trp1<math>\Delta</math>63</i> , <i>lys2-128<math>\delta</math></i> , <i>hht2-G34L</i> , <i>hht1<math>\Delta</math>::kanMX</i> | This Study                |
| <i>hht2-G34R</i> (ACY2838)                         | <i>MAT<math>\alpha</math></i> , <i>ura3-52</i> , <i>leu2<math>\Delta</math>1</i> , <i>his3<math>\Delta</math>200</i> , <i>trp1<math>\Delta</math>63</i> , <i>lys2-128<math>\delta</math></i> , <i>hht2-G34R</i>                                         | This Study                |
| <i>hht2-G34R hht1<math>\Delta</math></i> (ACY2840) | <i>MAT<math>\alpha</math></i> , <i>ura3-52</i> , <i>leu2<math>\Delta</math>1</i> , <i>his3<math>\Delta</math>200</i> , <i>trp1<math>\Delta</math>63</i> , <i>lys2-128<math>\delta</math></i> , <i>hht2-G34R</i> , <i>hht1<math>\Delta</math>::kanMX</i> | This Study                |
| <i>hht2-G34V</i> (ACY2841)                         | <i>MAT<math>\alpha</math></i> , <i>ura3-52</i> , <i>leu2<math>\Delta</math>1</i> , <i>his3<math>\Delta</math>200</i> , <i>trp1<math>\Delta</math>63</i> , <i>lys2-128<math>\delta</math></i> , <i>hht2-G34V</i>                                         | This Study                |
| <i>hht2-G34V hht1<math>\Delta</math></i> (ACY2846) | <i>MAT<math>\alpha</math></i> , <i>ura3-52</i> , <i>leu2<math>\Delta</math>1</i> , <i>his3<math>\Delta</math>200</i> , <i>trp1<math>\Delta</math>63</i> , <i>lys2-128<math>\delta</math></i> , <i>hht2-G34V</i> , <i>hht1<math>\Delta</math>::kanMX</i> | This Study                |
| <i>set2<math>\Delta</math></i> (ACY2851)           | <i>MAT<math>\alpha</math></i> , <i>ura3-52</i> , <i>leu2<math>\Delta</math>1</i> , <i>his3<math>\Delta</math>200</i> , <i>lys2-128<math>\delta</math></i> , <i>set2<math>\Delta</math>::kanMX</i>                                                       | This Study                |
| YEp352 (pAC29)                                     | <i>URA3</i> , $2\mu$ , <i>amp<sup>R</sup></i>                                                                                                                                                                                                           | (HILL <i>et al.</i> 1986) |
| <i>SUP3</i> (pAC4132)                              | <i>SGV1</i> , <i>URA3</i> , $2\mu$ , <i>amp<sup>R</sup></i>                                                                                                                                                                                             | This Study                |
| <i>SUP54</i> (pAC4145)                             | <i>HHT2</i> , <i>HHF2</i> , <i>URA3</i> , $2\mu$ , <i>amp<sup>R</sup></i>                                                                                                                                                                               | This Study                |
| <i>SUP67</i> (pAC4149)                             | <i>ESA1</i> , <i>URA3</i> , $2\mu$ , <i>amp<sup>R</sup></i>                                                                                                                                                                                             | This Study                |
| <i>SUP68</i> (pAC4150)                             | <i>TOS4</i> , <i>YLR184W</i> , <i>URA3</i> , $2\mu$ , <i>amp<sup>R</sup></i>                                                                                                                                                                            | This Study                |
| <i>SUP99</i> (pAC4160)                             | <i>PHO92</i> , <i>WIP1</i> , <i>BCS1</i> , <i>URA3</i> , $2\mu$ , <i>amp<sup>R</sup></i>                                                                                                                                                                | This Study                |
| <i>HHF2</i> (pAC4199)                              | <i>HHF2</i> , <i>URA3</i> , $2\mu$ , <i>amp<sup>R</sup></i>                                                                                                                                                                                             | This Study                |
| <i>HHT2</i> (pAC4201)                              | <i>HHT2</i> , <i>URA3</i> , $2\mu$ , <i>amp<sup>R</sup></i>                                                                                                                                                                                             | This Study                |
| <i>HHT1</i> (pAC4200)                              | <i>HHT1</i> , <i>URA3</i> , $2\mu$ , <i>amp<sup>R</sup></i>                                                                                                                                                                                             | This Study                |
| <i>ESA1</i> (pAC4190)                              | <i>ESA1</i> , <i>URA3</i> , $2\mu$ , <i>amp<sup>R</sup></i>                                                                                                                                                                                             | This Study                |
| <i>esa1-C304S</i> (pAC4191)                        | <i>esa1-C304S</i> , <i>URA3</i> , $2\mu$ , <i>amp<sup>R</sup></i>                                                                                                                                                                                       | This Study                |
| <i>esa1-E338Q</i> (pAC4192)                        | <i>esa1-E338Q</i> , <i>URA3</i> , $2\mu$ , <i>amp<sup>R</sup></i>                                                                                                                                                                                       | This Study                |
| <i>TOS4</i> (pAC4196)                              | <i>TOS4</i> , <i>URA3</i> , $2\mu$ , <i>amp<sup>R</sup></i>                                                                                                                                                                                             | This Study                |
| <i>tos4-R122A-N161A</i> (pAC4205)                  | <i>tos4-R122A-N161A</i> , <i>URA3</i> , $2\mu$ , <i>amp<sup>R</sup></i>                                                                                                                                                                                 | This Study                |
| <i>PHO92</i> (pAC4193)                             | <i>PHO92</i> , <i>URA3</i> , $2\mu$ , <i>amp<sup>R</sup></i>                                                                                                                                                                                            | This Study                |
| <i>pho92-W177A</i> (pAC4194)                       | <i>pho92-W177A</i> , <i>URA3</i> , $2\mu$ , <i>amp<sup>R</sup></i>                                                                                                                                                                                      | This Study                |
| <i>pho92-W231A</i> (pAC4195)                       | <i>pho92-W231A</i> , <i>URA3</i> , $2\mu$ , <i>amp<sup>R</sup></i>                                                                                                                                                                                      | This Study                |
| <i>SGV1</i> (pAC4187)                              | <i>SGV1</i> , <i>URA3</i> , $2\mu$ , <i>amp<sup>R</sup></i>                                                                                                                                                                                             | This Study                |
| <i>sgv1-E107Q</i> (pAC4188)                        | <i>sgv1-E107Q</i> , <i>URA3</i> ; $2\mu$ , <i>amp<sup>R</sup></i>                                                                                                                                                                                       | This Study                |
| <i>sgv1-D213A</i> (pAC4189)                        | <i>sgv1-D213A</i> , <i>URA3</i> ; $2\mu$ , <i>amp<sup>R</sup></i>                                                                                                                                                                                       | This Study                |
| <i>sgv1-<math>\Delta</math>2+8aa</i> (pAC4208)     | <i>sgv1-<math>\Delta</math>2+8aa</i> , <i>URA3</i> , $2\mu$ , <i>amp<sup>R</sup></i>                                                                                                                                                                    | This Study                |
| <i>SGV1-Myc</i> (pAC4209)                          | <i>SGV1-Myc</i> , <i>URA3</i> , $2\mu$ , <i>amp<sup>R</sup></i>                                                                                                                                                                                         | This Study                |
| <i>sgv1-E107Q-Myc</i> (pAC4210)                    | <i>sgv1-E107Q-Myc</i> , <i>URA3</i> , $2\mu$ , <i>amp<sup>R</sup></i>                                                                                                                                                                                   | This Study                |
| <i>sgv1-D213A-Myc</i> (pAC4211)                    | <i>sgv1-D213A-Myc</i> , <i>URA3</i> , $2\mu$ , <i>amp<sup>R</sup></i>                                                                                                                                                                                   | This Study                |
| <i>SUP3-E107Q</i> (pAC4212)                        | <i>SUP3-E107Q</i> , <i>URA3</i> , $2\mu$ , <i>amp<sup>R</sup></i>                                                                                                                                                                                       | This Study                |
| <i>SUP3-D213A</i> (pAC4213)                        | <i>SUP3-D213A</i> , <i>URA3</i> , $2\mu$ , <i>amp<sup>R</sup></i>                                                                                                                                                                                       | This Study                |

## Supplemental Figure 1

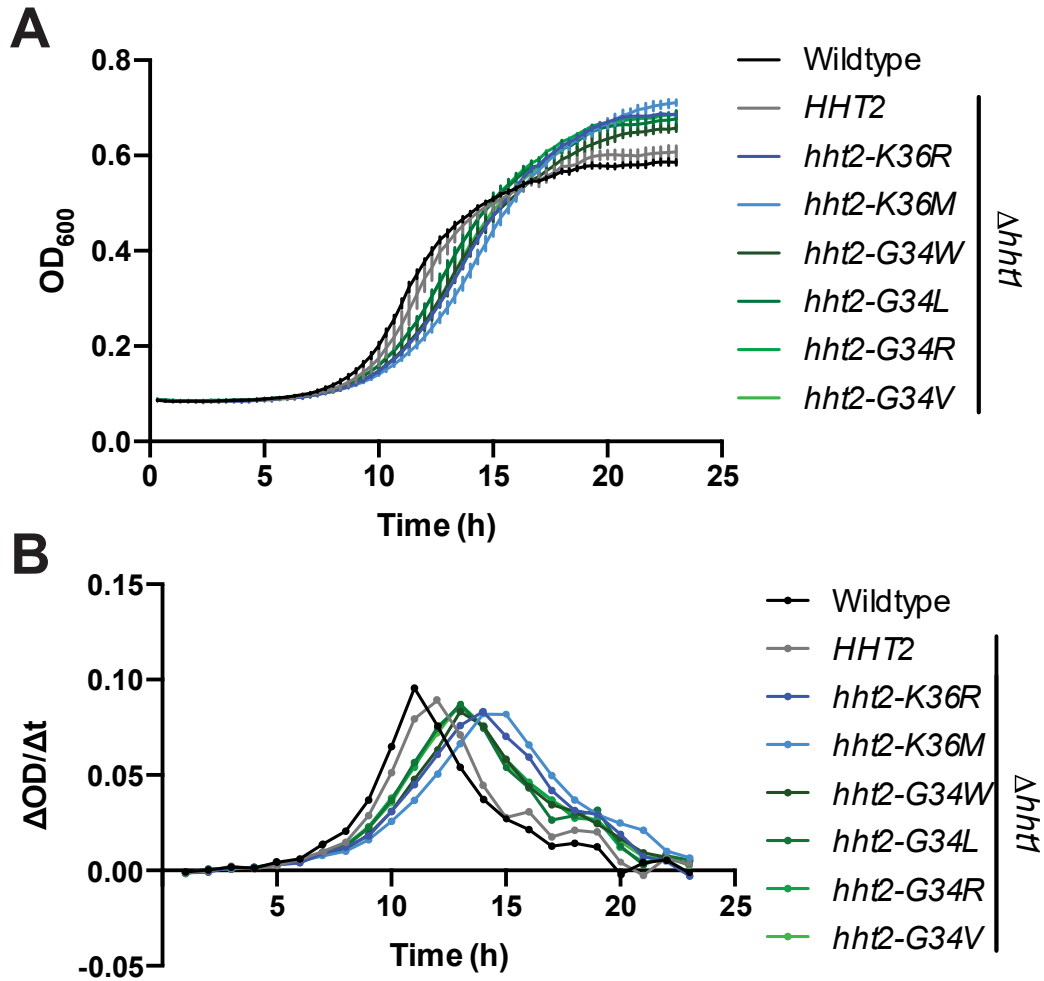

**Figure S1.** (A) Control Wildtype and *HHT2 hht1*Δ cells (black), H3K36 mutant cells (*hht2-K36R/M hht1*Δ) (blue), or H3G34 mutant cells (*hht2-G34W/L/R/V hht1*Δ) (green) were grown in YEPD liquid media and growth was assessed by measuring OD<sub>600</sub> every 20 minutes in a plate reader for 24 hours. (B) The area under the growth curve was obtained for each of the mutants analyzed, revealing that the histone mutant cells achieve a higher biomass than either control.

**Supplemental Figure 2**

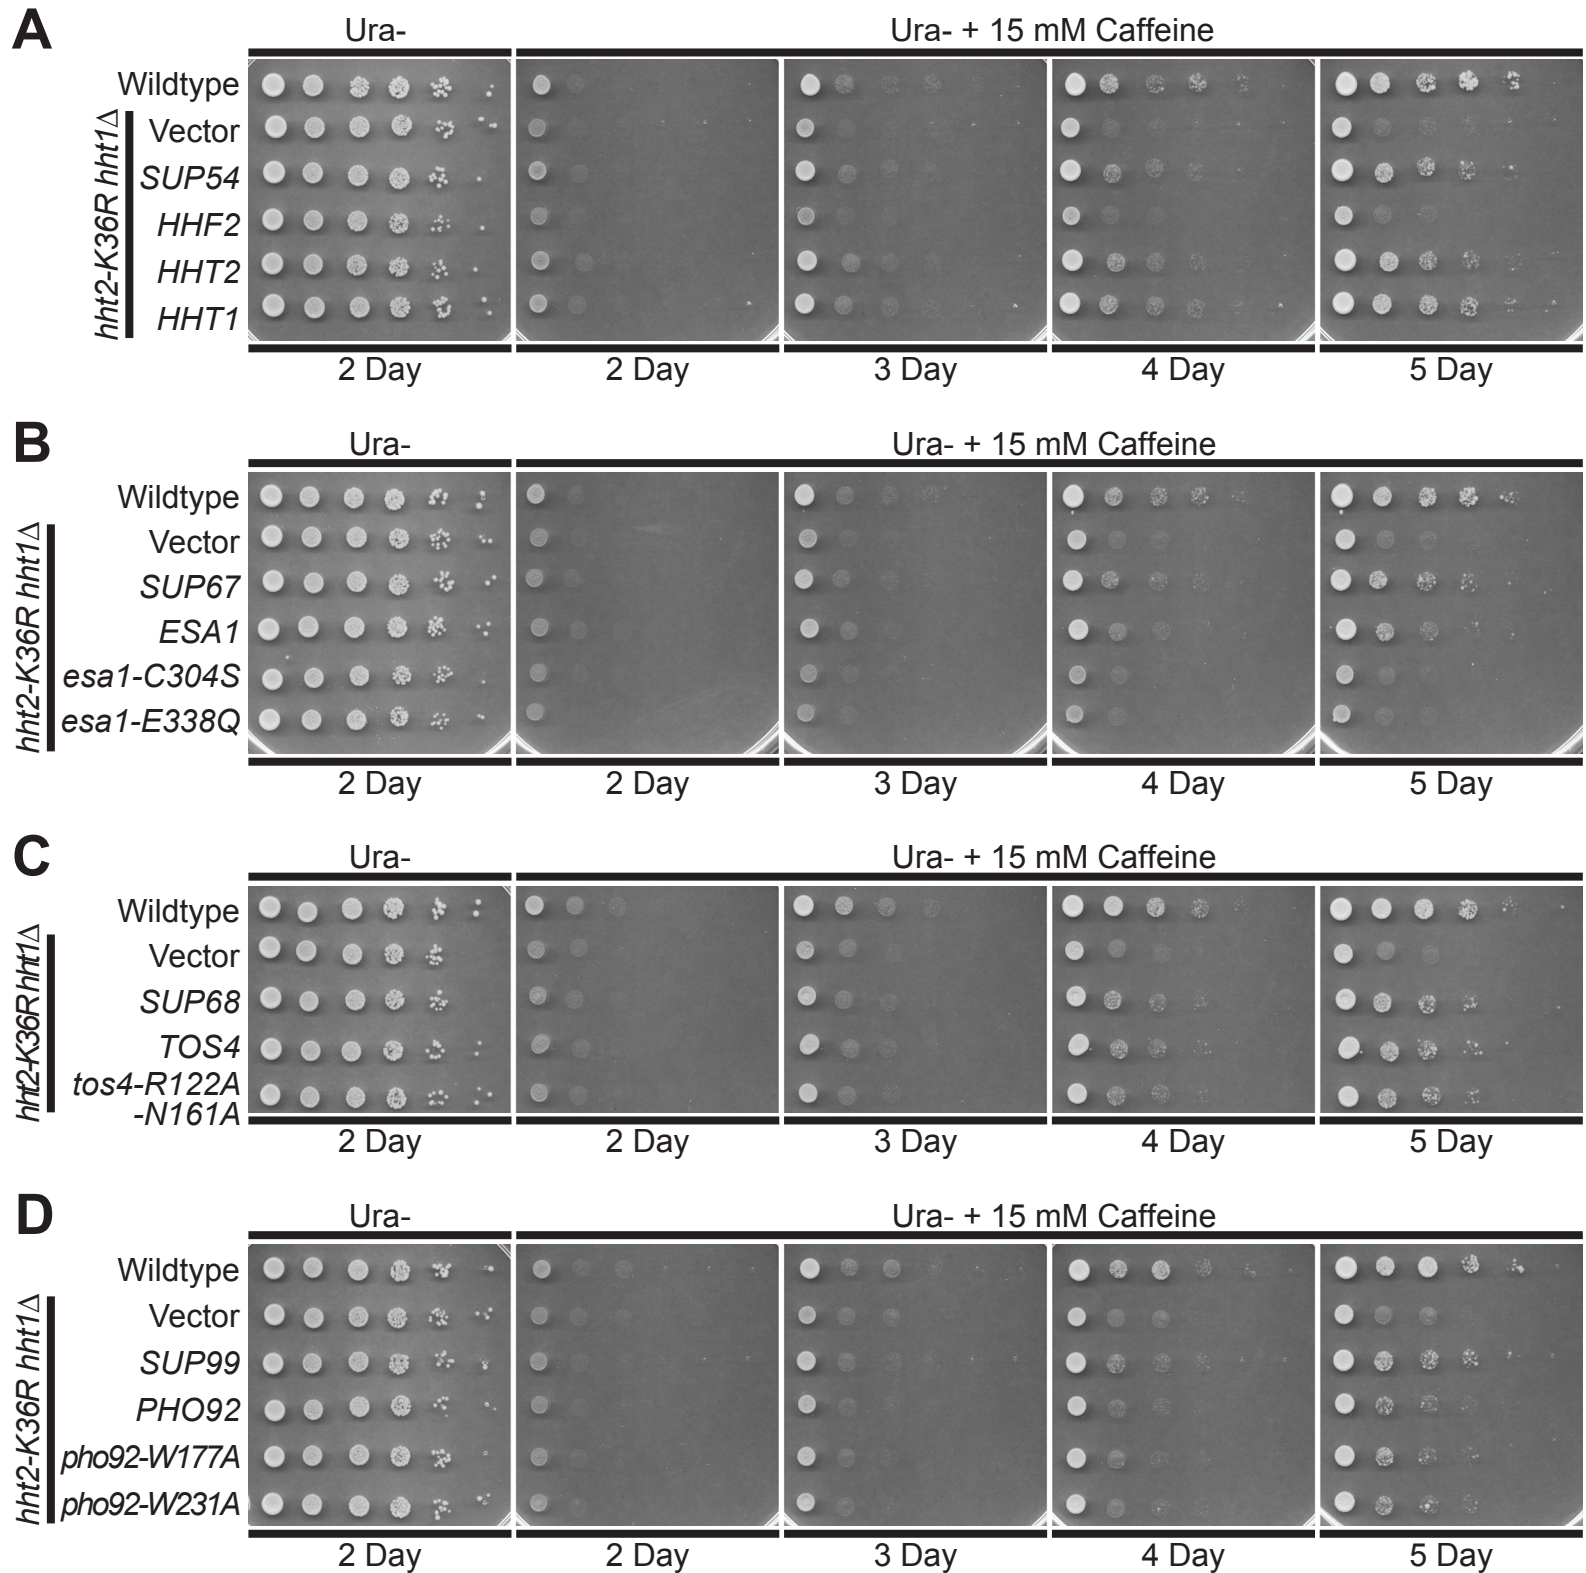

**Figure S2.** High copy suppressors identified suppress caffeine sensitive growth of H3K36R cells on Ura<sup>-</sup> plates. For the following high copy suppressors: (A) *HHT2*, (B) *ESA1*, (C) *TOS4*, and (D) *PHO92* serial dilution growth assays are shown for the original *SUP* clone isolated, the subcloned suppressor, and any variants tested on Ura<sup>-</sup> plates that contain 15 mM caffeine. Results on plates with caffeine are shown for Day 2 to Day 5.

### Supplemental Figure 3

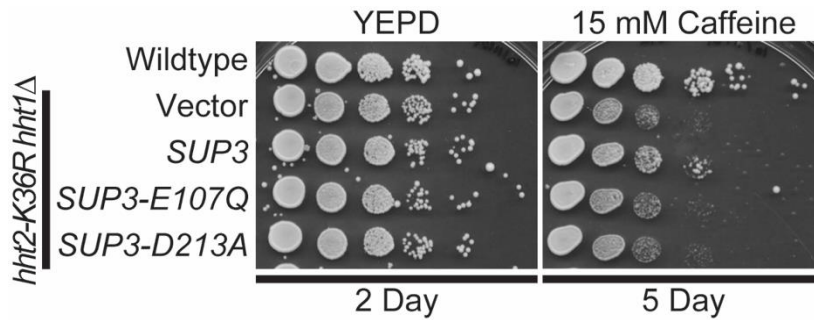

**Figure S3.** Both the catalytic activity of Sgv1 and a C-terminal extension are required for Sgv1-mediated suppression of H3K36R caffeine sensitive growth. Using the original suppressor clone, termed *SUP3*, either of two Sgv1 amino acid substitutions that impair Sgv1 catalytic activity (E107Q or D213A) (KEOGH *et al.* 2003) engineered into the original suppressor clone, *SUP3*, identified abrogate suppression.

### Supplemental References

Duina, A. A., and C. E. Turkal, 2017 Targeted in Situ Mutagenesis of Histone Genes in Budding Yeast. *J Vis Exp*: 55263.

Hill, J. E., A. M. Myers, T. J. Koerner and A. Tzagoloff, 1986 Yeast/*E. coli* shuttle vectors with multiple unique restriction sites. *Yeast* 2: 163-167.

Keogh, M. C., V. Podolny and S. Buratowski, 2003 Bur1 kinase is required for efficient transcription elongation by RNA polymerase II. *Mol Cell Biol* 23: 7005-7018.
